# Supplementary material for: Analysis of cognitive ability and adaptive behavior assessment tools used in an observational study of patients with mucopolysaccharidosis II
Source: PubMed Central journal article supplement (PMC8643008; doi:10.1186/s13023-021-02118-3), 2021-12-04

## Additional file 1

**Table S1.** Individual patient early years and school age DAS-II GCA scores by study visit

| Patient | Study visit (month) |    |     |     |     |     |     |     |     |
|---------|---------------------|----|-----|-----|-----|-----|-----|-----|-----|
|         | 0                   | 3  | 6   | 9   | 12  | 15  | 18  | 21  | 24  |
| #1*     | 60                  | 64 | 72  | 67  | -   | -   | -   | -   | -   |
| #2*     | 87                  | 83 | 66  | 75  | 77  | -   | -   | -   | -   |
| #3*     | 89                  | 80 | 63  | 98  | 84  | 80  | -   | -   | -   |
| #4*     | 95                  | 87 | 88  | -   | 74  | -   | -   | -   | -   |
| #5*     | 83                  | 66 | -   | -   | -   | -   | -   | -   | -   |
| #6      | 91                  | -  | 77  | -   | -   | -   | -   | -   | -   |
| #7      | 59                  | -  | -   | -   | -   | 39  | 42  | 32  | 33  |
| #8      | 70                  | -  | -   | -   | -   | -   | -   | -   | 34  |
| #9*     | 66                  | -  | -   | -   | -   | -   | -   | -   | -   |
| #10     | 81                  | 82 | 83  | 85  | 89  | 86  | 84  | 83  | 87  |
| #11     | 62                  | 63 | -   | 73  | 72  | 63  | 68  | 68  | 66  |
| #12     | 79                  | -  | -   | -   | -   | -   | -   | -   | -   |
| #13*    | 56                  | 46 | 50  | 33  | 45  | -   | -   | -   | -   |
| #14*    | 90                  | 92 | 90  | 84  | 91  | 87  | 71  | -   | 88  |
| #15*    | 68                  | 63 | 65  | 63  | -   | -   | -   | -   | -   |
| #16*    | 92                  | 87 | 91  | 70  | 77  | 79  | -   | -   | -   |
| #17*    | -                   | -  | 77  | 64  | 69  | 76  | 56  | 61  | -   |
| #18     | -                   | 78 | 86  | 95  | 87  | 87  | 89  | 94  | 92  |
| #19*    | 64                  | 63 | 64  | -   | -   | -   | -   | -   | -   |
| #20     | 55                  | 47 | 55  | 51  | 48  | 51  | 47  | 56  | -   |
| #21     | 79                  | 84 | 84  | 89  | 89  | 82  | -   | -   | -   |
| #22     | 59                  | 42 | 52  | 37  | -   | -   | -   | -   | -   |
| #23*    | 65                  | -  | -   | -   | -   | -   | -   | -   | -   |
| #24*    | -                   | 73 | -   | 55  | -   | -   | -   | -   | -   |
| #25     | 81                  | 80 | 80  | 73  | 77  | 73  | 76  | 76  | 74  |
| #26*    | -                   | 84 | 91  | 86  | -   | -   | -   | -   | -   |
| #27*    | -                   | 83 | -   | -   | -   | -   | -   | -   | -   |
| #28*    | -                   | -  | 78  | -   | -   | -   | -   | -   | -   |
| #29*    | 63                  | 75 | -   | -   | -   | -   | -   | -   | -   |
| #30*    | 82                  | 90 | 90  | 52  | -   | -   | -   | -   | -   |
| #31     | 105                 | 76 | 119 | 115 | 113 | 116 | 111 | 115 | 118 |
| #32     | 55                  | 59 | 60  | 71  | -   | -   | -   | -   | -   |
| #33     | 48                  | 62 | 69  | 61  | 58  | 44  | 47  | 45  | 37  |
| #34     | 86                  | 84 | 82  | 82  | 78  | 85  | 81  | 81  | 78  |
| #35     | 75                  | 77 | 74  | 81  | 77  | 82  | 77  | 76  | 74  |
| #36     | 72                  | 69 | 74  | 68  | 68  | 73  | 63  | 75  | 71  |
| #37     | 56                  | 51 | 43  | 48  | 51  | 47  | 46  | 49  | 52  |
| #38     | 65                  | 55 | 55  | 55  | 66  | 61  | 65  | 63  | 66  |

Asterisks indicate the 19 patients who discontinued to participate in the phase 2/3 intrathecal idursulfase trial (HGT-HIT-094; ClinicalTrials.gov identifier: NCT02055118). Hyphens denote that data were not available for that visit.

DAS-II, Differential Ability Scales, second edition; GCA, General Conceptual Ability

**Fig. S1 Patient study flow**

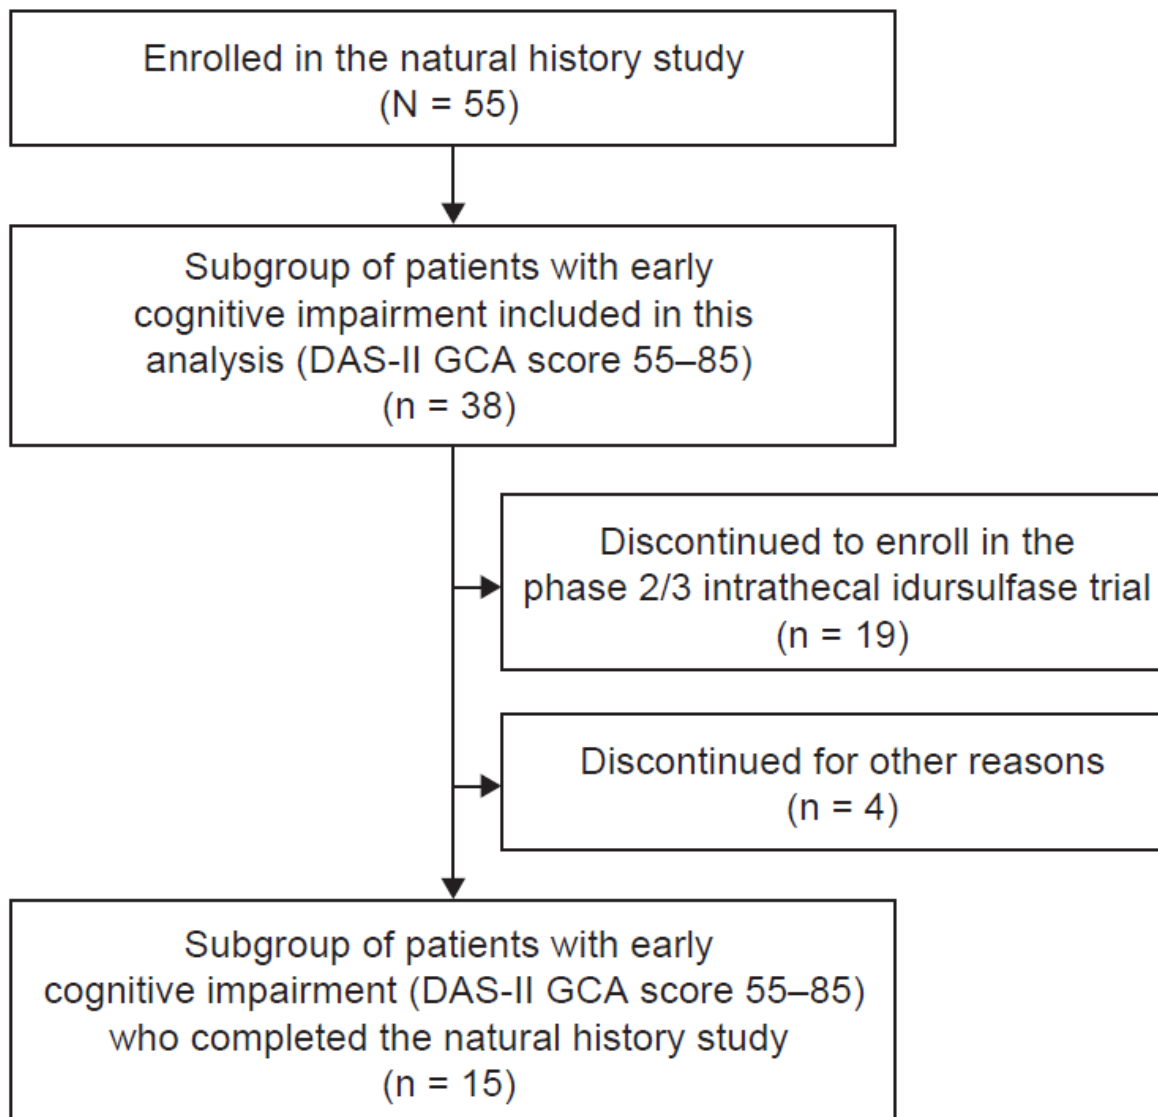

DAS-II, Differential Ability Scales, second edition; GCA, General Conceptual Ability

**Fig. S2** Individual early years DAS-II GCA scores for patients with assessments available at baseline and month 24

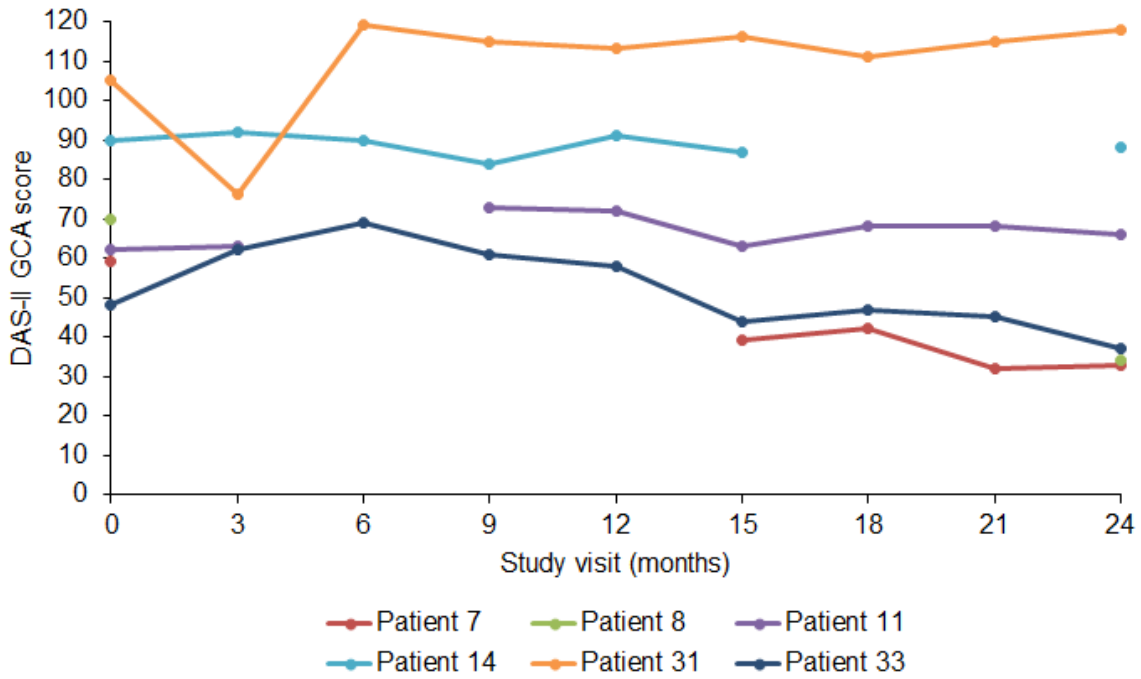

DAS-II, Differential Ability Scales, second edition; GCA, General Conceptual Ability

**Fig. S3** Adjusted LS mean percentage change from baseline in DAS-II early years subtest standard scores compared with the DAS-II early years GCA standard score: (A) matrices, (B) pattern construction, (C) verbal comprehension, (D) copying, (E) naming vocabulary and (F) picture similarities

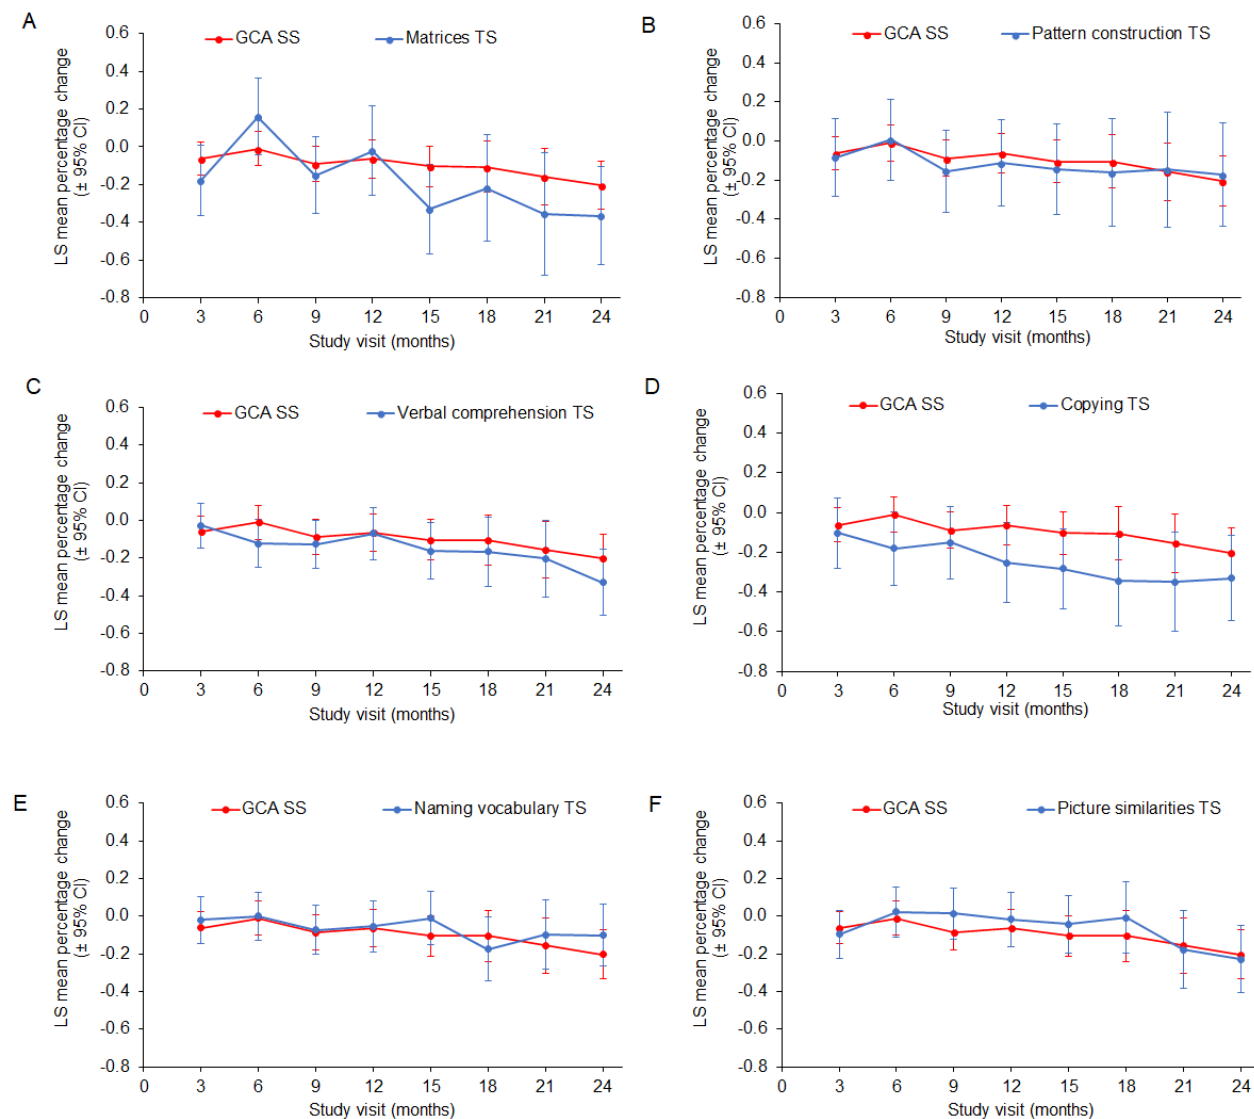

CI, confidence interval; DAS-II, Differential Ability Scales, second edition; GCA, General Conceptual Ability; LS, least-squares; SS, standard score; TS, *T* score

**Fig. S4** Adjusted LS mean percentage change from baseline in DAS-II school age subtest standard *T* scores compared with the DAS-II school age GCA standard score: (A) matrices, (B) pattern construction, (C) recall of designs, (D) reasoning, (E) word definitions and (F) verbal similarities

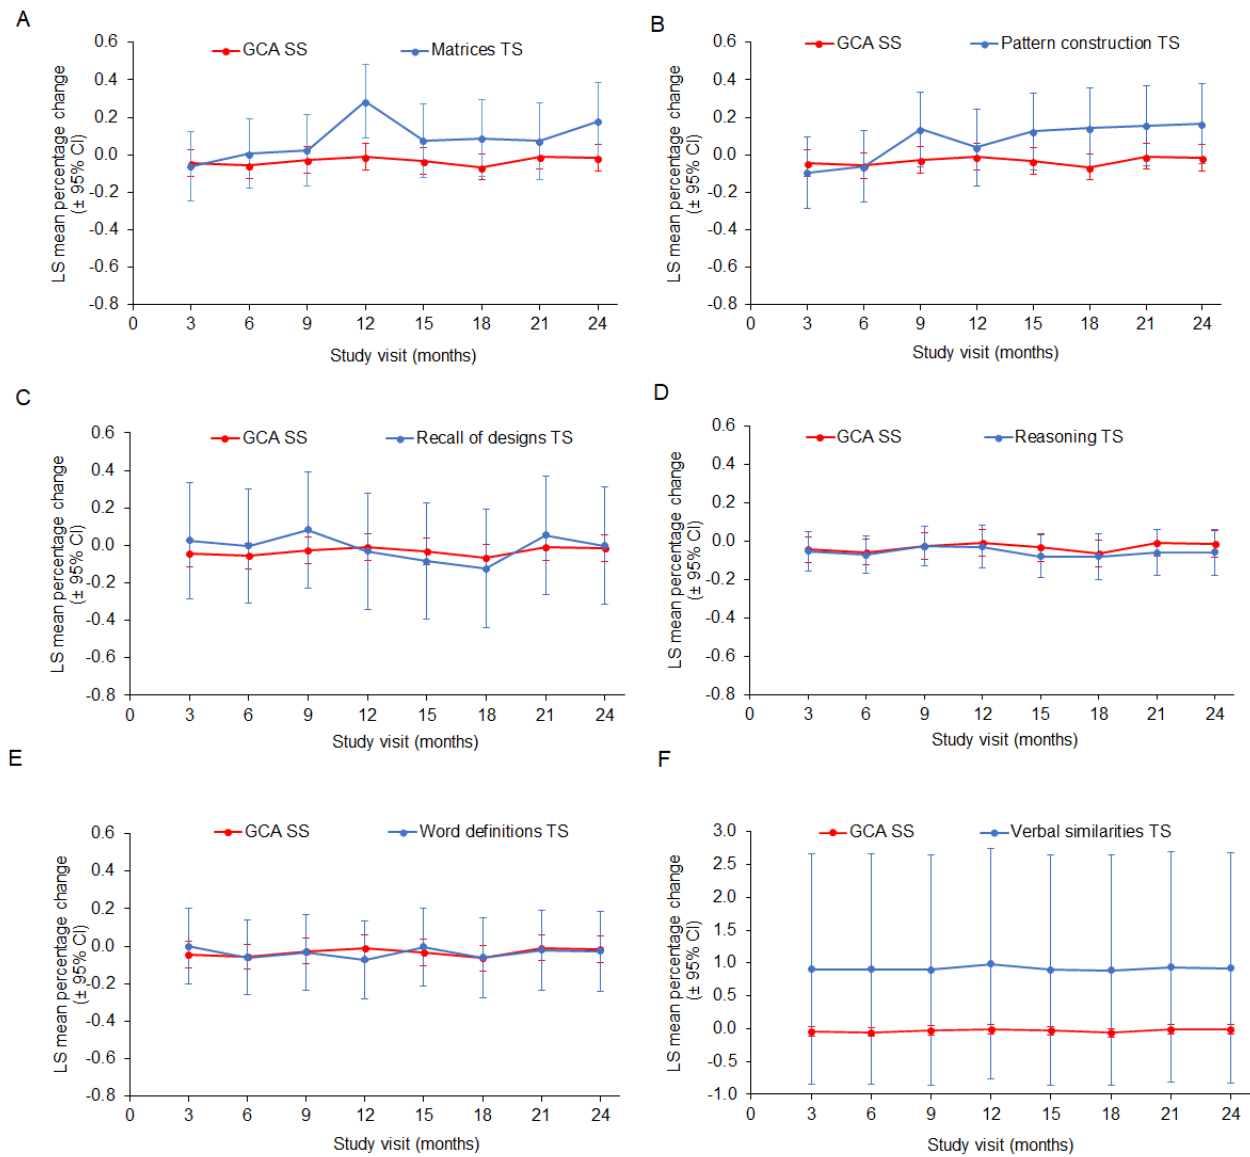

CI, confidence interval; DAS-II, Differential Ability Scales, second edition; GCA, General Conceptual Ability; LS, least-squares; SS, standard score; TS, *T* score

**Fig. S5** Adjusted LS mean percentage change from baseline in VABS-II communication subdomain V-scale scores compared with the VABS-II ABC score: (A) expressive communication, (B) receptive communication and (C) written communication

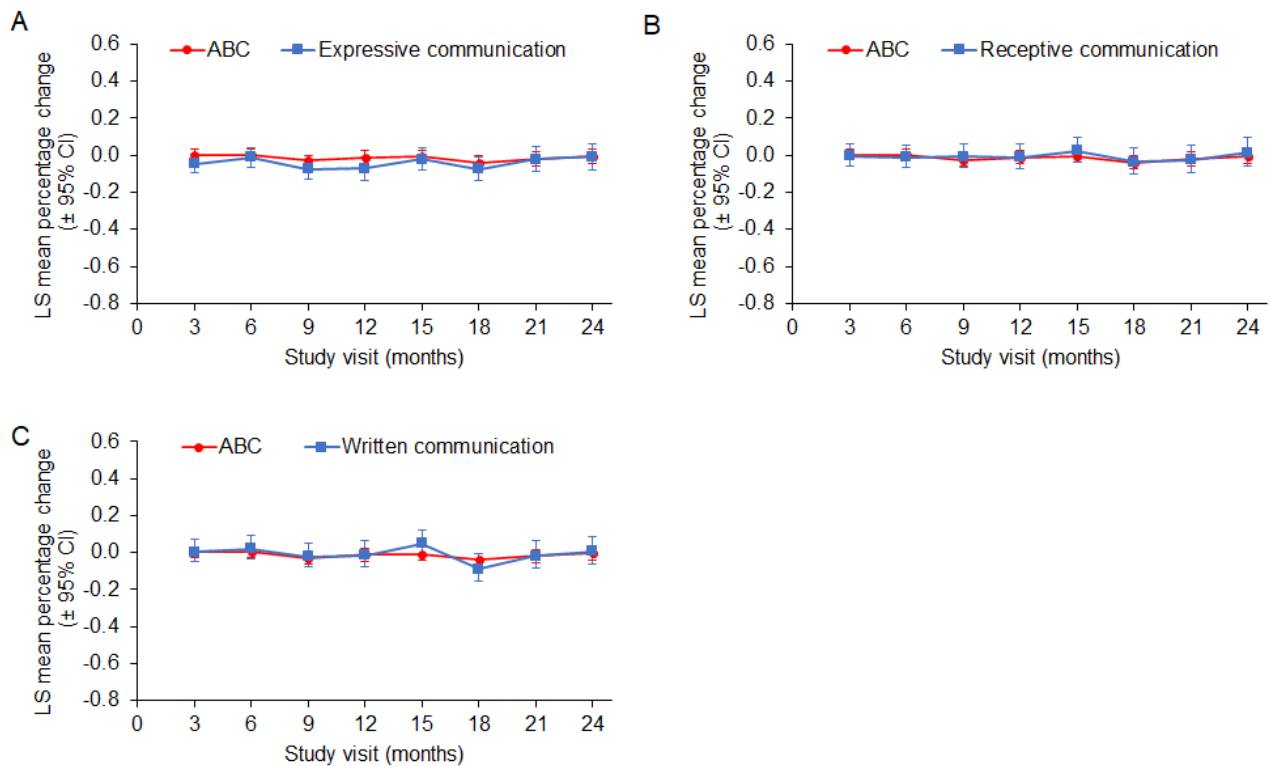

ABC, Adaptive Behavior Composite; CI, confidence interval; LS, least-squares; VABS-II, Vineland Adaptive Behavior Scales, second edition

**Fig. S6** Adjusted LS mean percentage change from baseline in VABS-II daily living skills subdomain V-scale scores compared with the VABS-II ABC score: (A) community daily living skills, (B) domestic daily living skills and (C) personal daily living skills

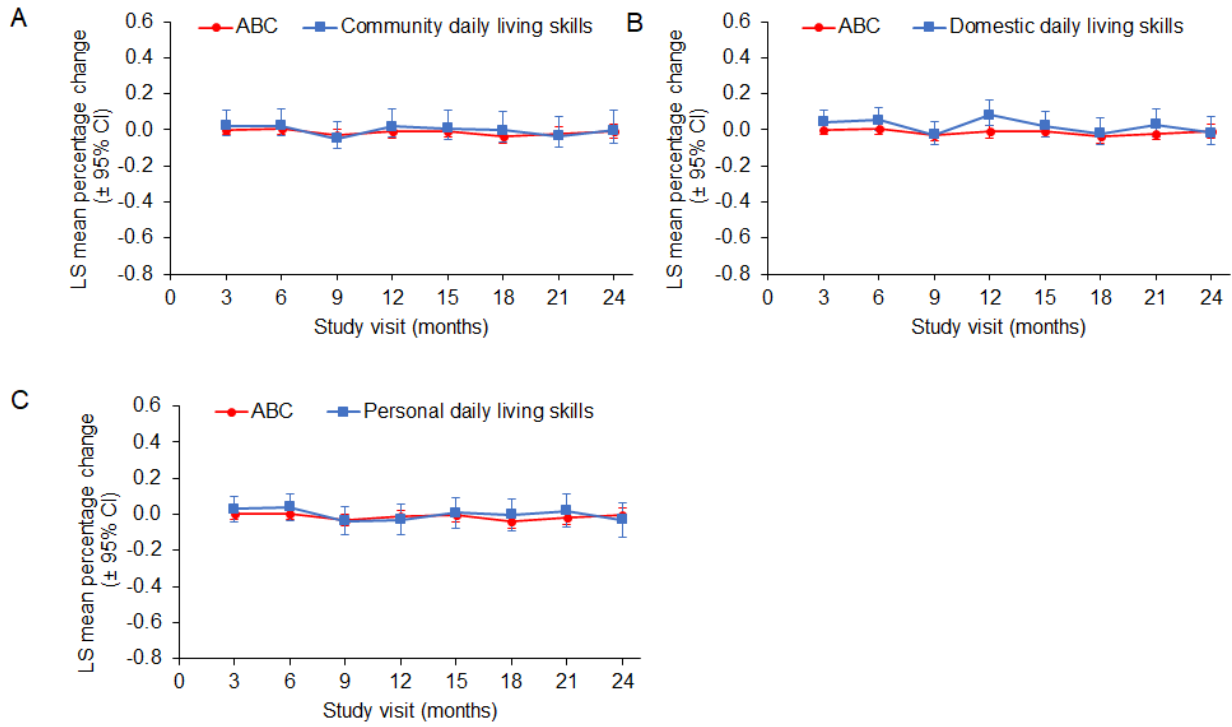

ABC, Adaptive Behavior Composite; CI, confidence interval; LS, least-squares; VABS-II, Vineland Adaptive Behavior Scales, second edition

**Fig. S7** Adjusted LS mean percentage change from baseline in VABS-II motor skills subdomain V-scale scores compared with the VABS-II ABC score: (A) fine motor skills and (B) gross motor skills

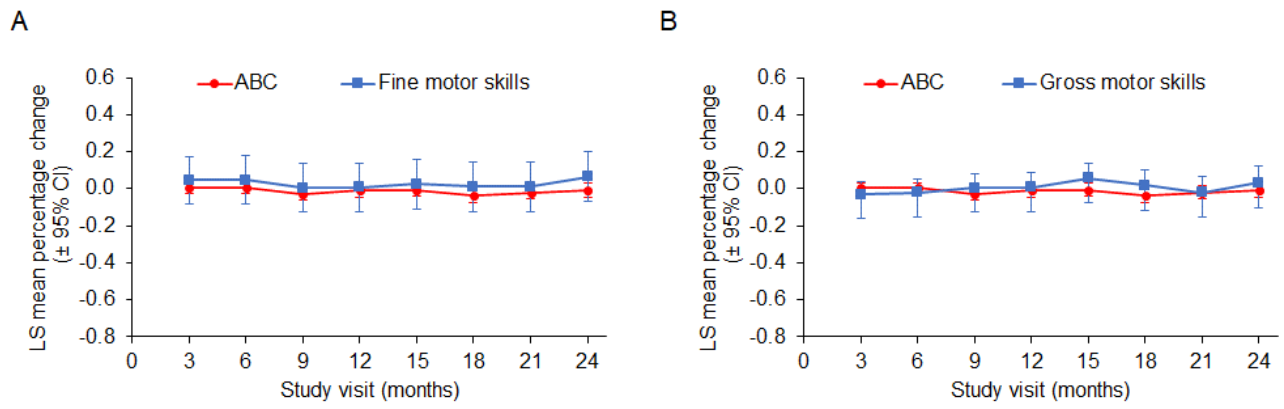

ABC, Adaptive Behavior Composite; CI, confidence interval; LS, least-squares; VABS-II, Vineland Adaptive Behavior Scales, second edition



**Fig. S8** Adjusted LS mean percentage change from baseline in socialization subdomain V-scale scores compared with the VABS-II ABC score: (A) socialization interpersonal relationships, (B) socialization play and leisure time and (C) socialization coping skills

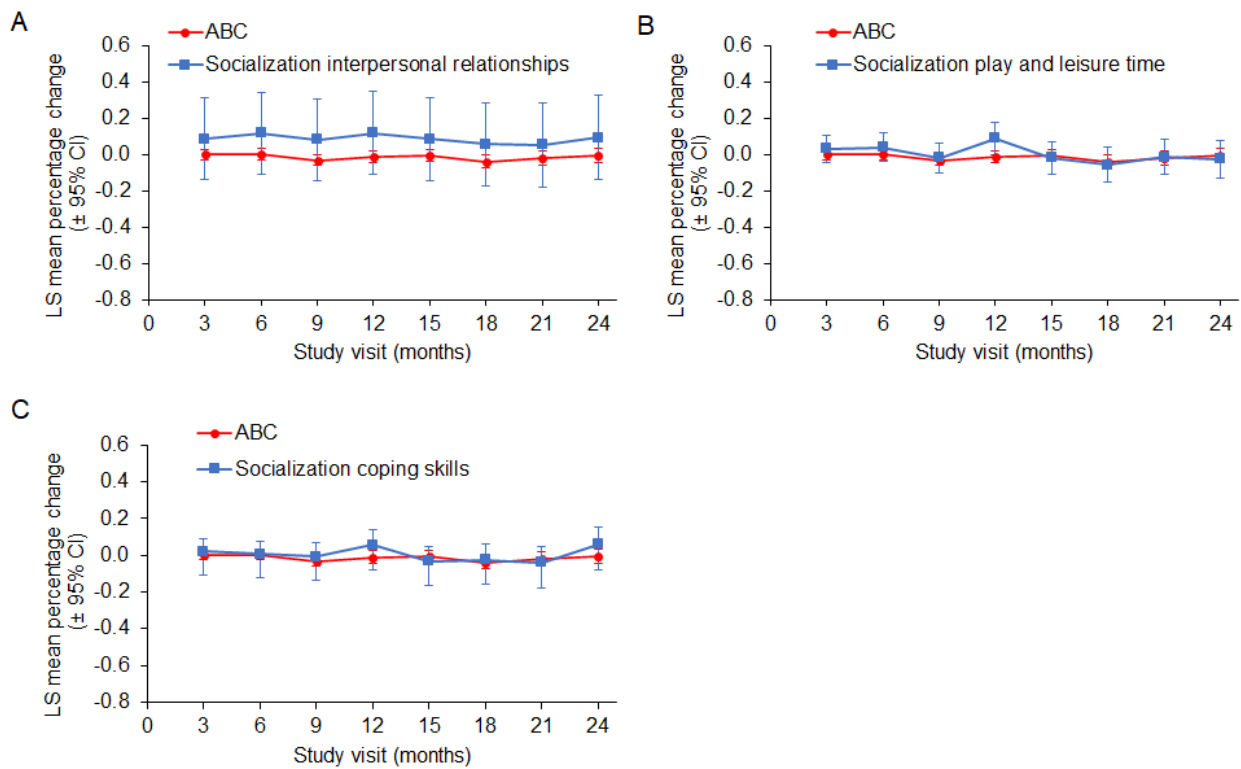

ABC, Adaptive Behavior Composite; CI, confidence interval; LS, least-squares; VABS-II, Vineland Adaptive Behavior Scales, second edition

**Fig. S9** HS-FOCUS domain and item scores: (A) activities, (B) breathing, (C) grip/reach, (D) school/work and (E) walking/standing

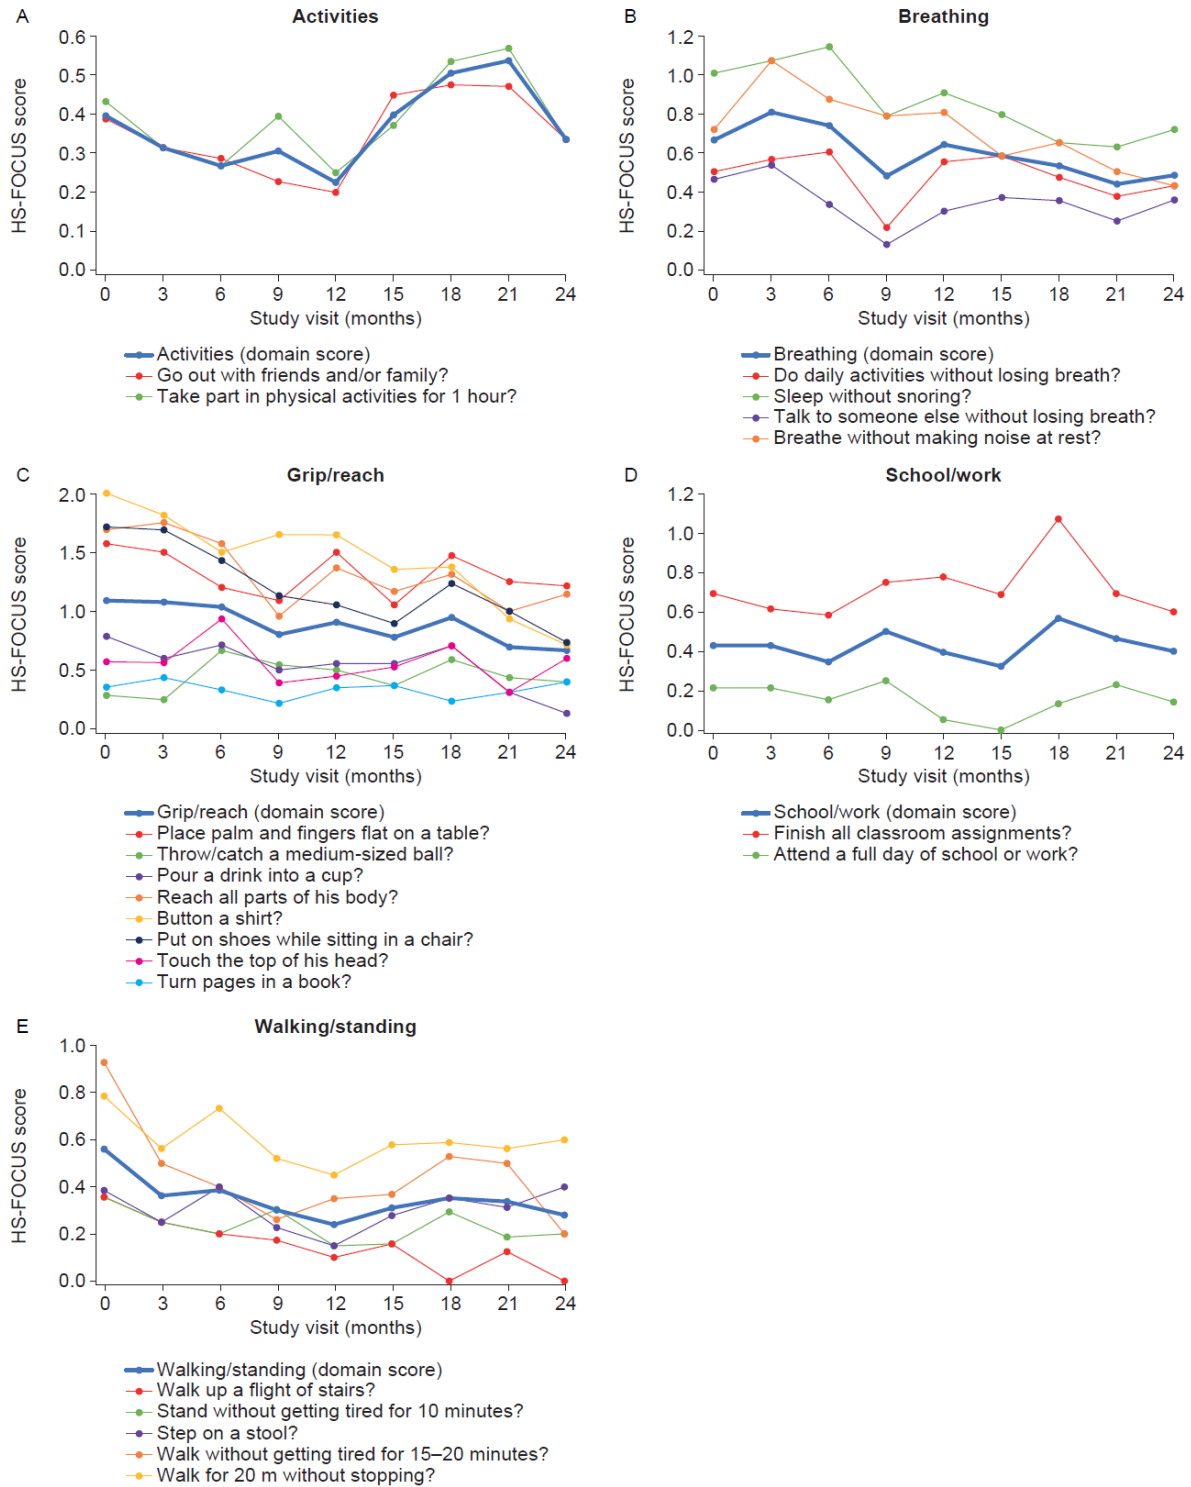

Supplement: 13023_2021_2118_MOESM1_ESM.pdf [file 13023_2021_2118_MOESM1_ESM.pdf]
